# Supplementary material
Source: MDPI journal article supplement (https://www.mdpi.com/2076-3417/11/22/10589)
Supplement: s1 [file s1]

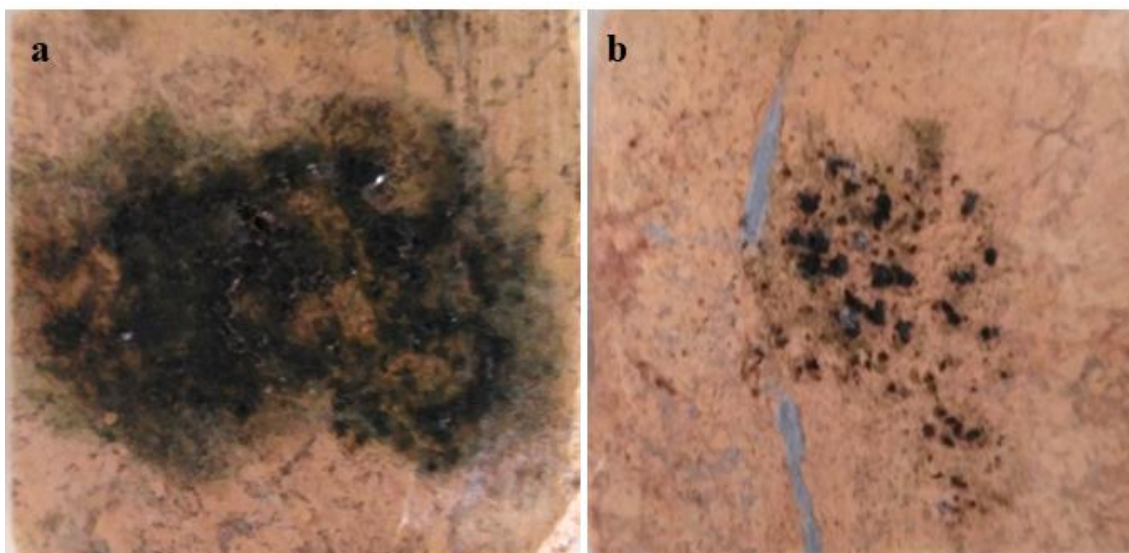

**Figure S1** – Preliminary results regarding the stone probes inoculated with *Parakomarekiella sesnandensis* in the absence (a) and in the presence (b) of 200  $\mu\text{l}$  of kappa/iota hybrid carrageenans ( $0.01 \text{ g mL}^{-1}$ ), after 1 year period.
